# Supplementary figures and images for: A Rare Case of Dedifferentiated Liposarcoma with Osteosarcomatous Differentiation-Diagnostic and Therapeutic Challenges
Source: MDPI journal article supplement (doi:10.3390/diseases12010006), 2023-12-25

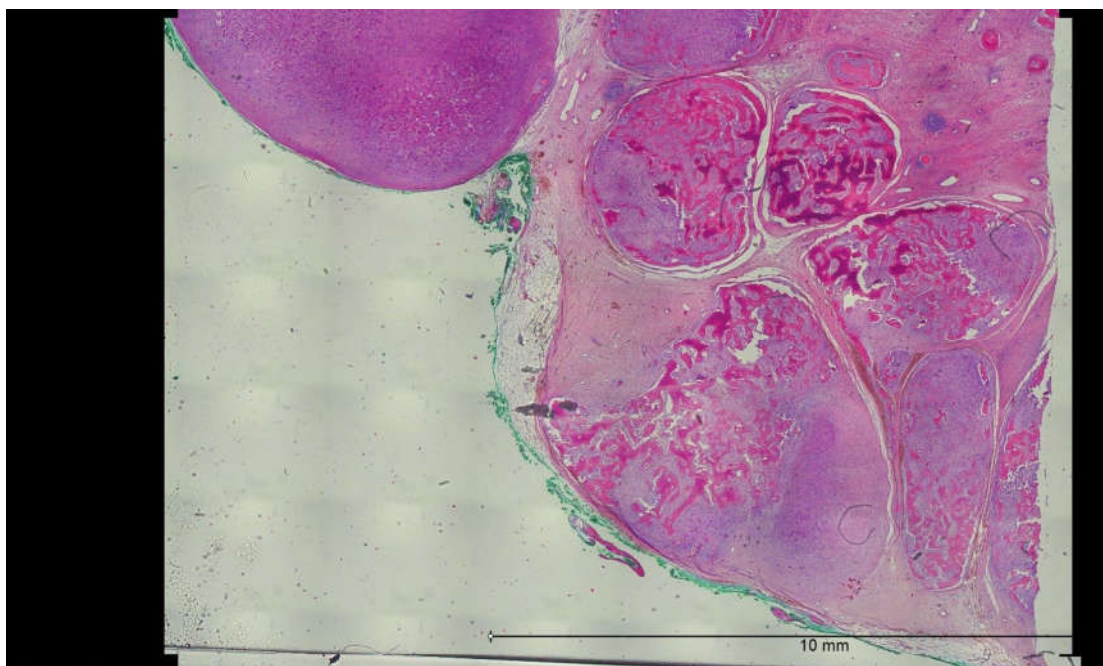

Figure S1. Capsule microphotograph

Supplement: s1 [file diseases-2750177-supplementary.pdf › diseases-2750177-supplementary.pdf]
